# Supplementary figures and images for: A Prospective Study of Racial and Ethnic Variation in VA Psychotherapy Services for PTSD
Source: Atypon-hosted journal article supplement (doi:10.1176/appi.ps.201600086), 2016-11-01

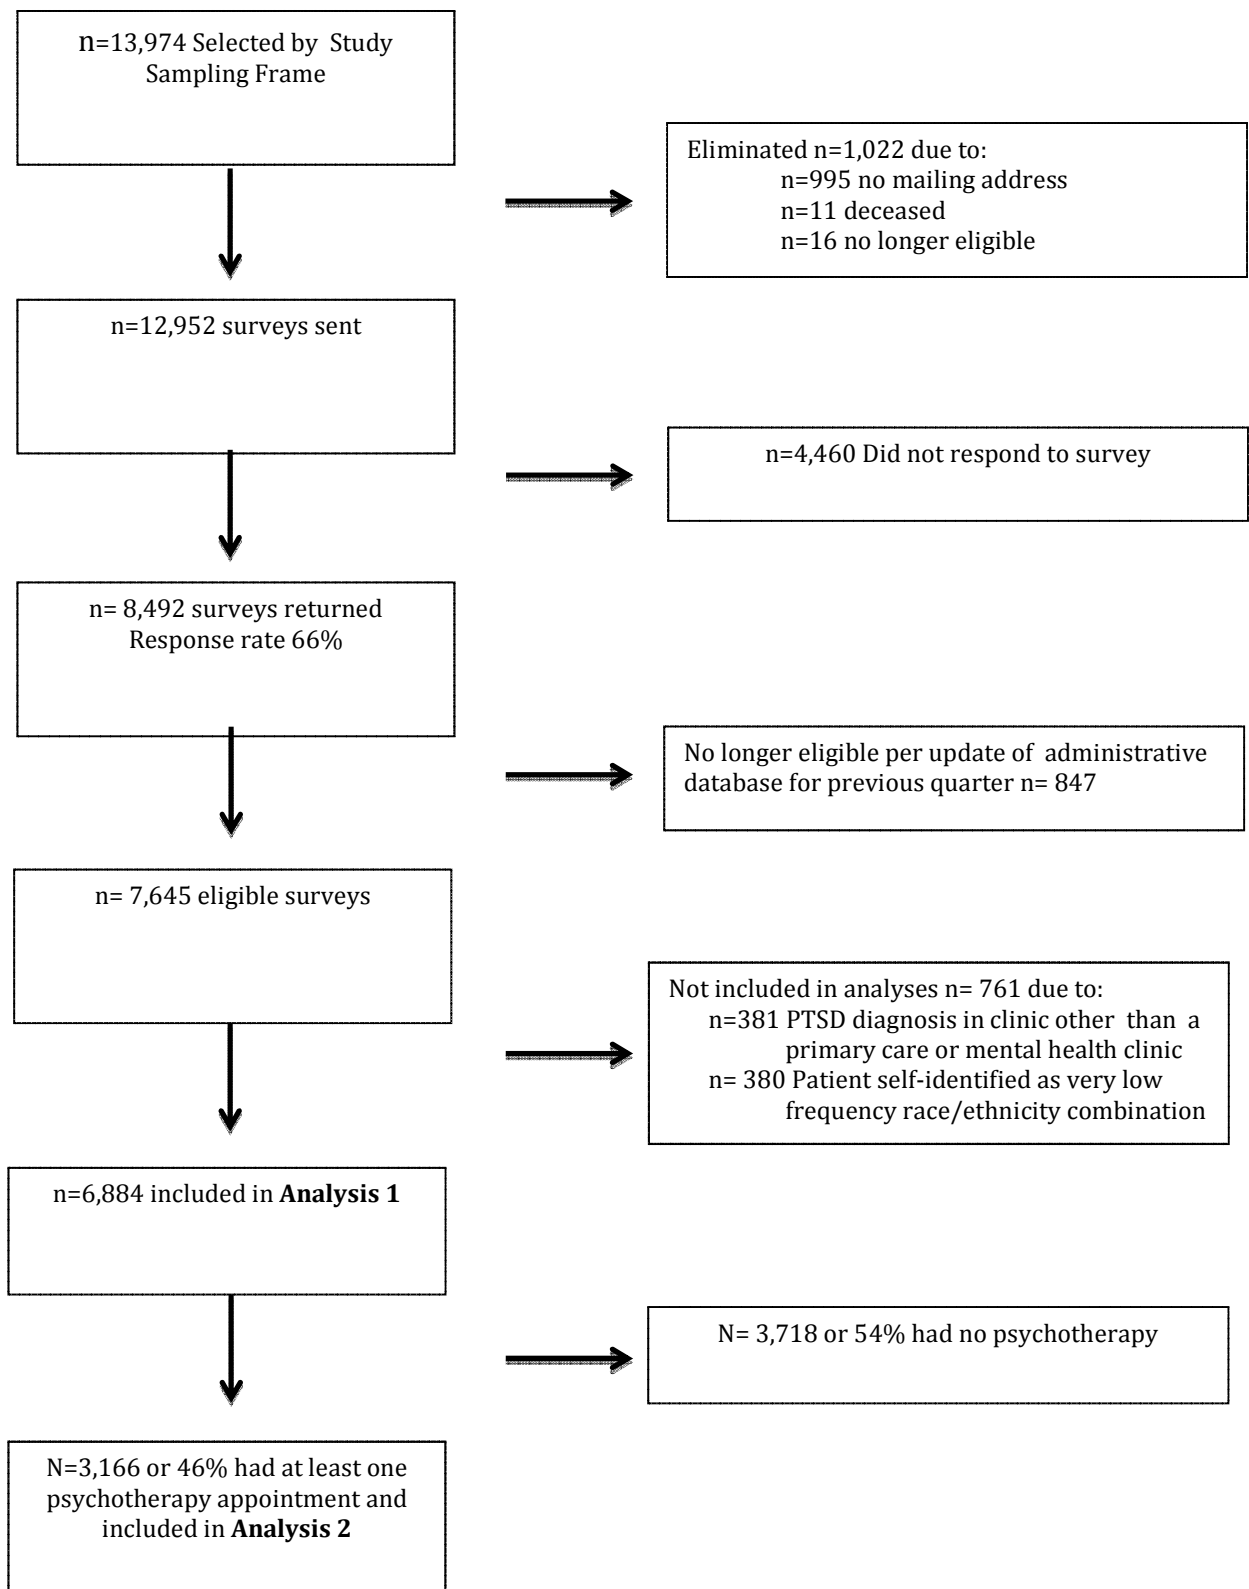

Supplement: appi.ps.201600086.ds001.pdf [file appi.ps.201600086.ds001.pdf]
